# Supplementary material for: Amorphous ReS2 decorated TiO2 nanowire arrays for highly-efficient nitrogen reduction
Source: Royal Society of Chemistry journal article supplement (doi:10.1039/d1cc01642c), 2021-01-01
Supplement: d1cc01642c1.pdf [file d1cc01642c1.pdf]

## Supporting Information

### Amorphous ReS<sub>2</sub> Decorated TiO<sub>2</sub> Nanowire Arrays for Highly Efficient Nitrogen Reduction

Xiaoying Lu, Hua Li, Yantao Wang, Junfeng Huang, Cailing Xu\*

State Key Laboratory of Applied Organic Chemistry, Laboratory of Special Function Materials and Structure Design of the Ministry of Education, College of Chemistry and Chemical Engineering, Lanzhou University, Lanzhou 730000, China

\*Email: xucl@lzu.edu.cn

#### 1. Experimental section

##### 1.1 Materials

All materials were directly used without further purification. Ti plate (99.9% purity, 5 mm thickness) and ammonium perrhenate (NH<sub>4</sub>ReO<sub>4</sub>) were purchased from Alfa Aesar. Thioacetamide (TAA), salicylic acid (C<sub>7</sub>H<sub>6</sub>O<sub>3</sub>), sodium citrate dehydrate (C<sub>6</sub>H<sub>5</sub>Na<sub>3</sub>O<sub>7</sub>•2H<sub>2</sub>O), hydrochloric acid (HCl), anhydrous ethanol, acetone, hydrazine hydrate (N<sub>2</sub>H<sub>4</sub>•H<sub>2</sub>O) and sodium hypochlorite (NaClO) were obtained from Cologne Sinopharm Chemical Reagent Co., Ltd. (China). Sodium nitroferricyanide (III) dihydrate (C<sub>5</sub>FeN<sub>6</sub>Na<sub>2</sub>O), sodium hydrate (NaOH) and sulfuric acid (H<sub>2</sub>SO<sub>4</sub>) were bought from Damao Chemical Reagent Factory (Tianjin, China). Ammonium chloride (NH<sub>4</sub>Cl) and anhydrous sodium sulfate (Na<sub>2</sub>SO<sub>4</sub>) were purchased from Aladdin Ltd. (Shanghai, China). Electrolyte solutions were prepared with by Deionized water (DI, Millipore, 18.2 MΩ cm).

##### 1.2 Preparation of samples

### 1.2.1 Synthesis of TiO<sub>2</sub> nanowires

The detail preparation process was similar to that reported in our previous report<sup>1</sup>. Firstly, Ti plates (1.0 cm × 2.0 cm) were sonicated with CH<sub>3</sub>COCH<sub>3</sub>, C<sub>2</sub>H<sub>5</sub>OH and H<sub>2</sub>O for 20 min, respectively. Secondly, the cleaned Ti foil was put into a 25 mL Teflon-lined autoclave filled with 10 mL of 2.5 % HCl aqueous solution and kept at 190 °C for 12 h. After being cooled to room temperature, the Ti foil was completely washed with deionized water several times and dried in the air. Finally, the as-prepared Ti nanowires (NWs) were then annealed at 450 °C for 10 h to form TiO<sub>2</sub> NWs.

### 1.2.2 Synthesis of ReS<sub>2</sub>/TiO<sub>2</sub> heterostructure

ReS<sub>2</sub> nanosheets were grafted on the surface of TiO<sub>2</sub> NWs via a facile hydrothermal process. 40 mg of NH<sub>4</sub>ReO<sub>4</sub> (3 mM) and 60 mg of TAA were dissolved in 30 mL of deionized water and stirred for 30 min to obtain a mixed solution. Then, TiO<sub>2</sub> NWs soaked in the mixed solution in a 50 mL Teflon-lined stainless steel autoclave and kept at 200 °C for 24 h. After being cooled naturally to room temperature, the TiO<sub>2</sub> NWs was taken out, washed with deionized water and anhydrous ethanol, and dried at 60 °C overnight. By adjusting the amount of the precursor NH<sub>4</sub>ReO<sub>4</sub>, the attained samples were named as: ReS<sub>2</sub>/TiO<sub>2</sub>-0.75 (0.75 mM), ReS<sub>2</sub>/TiO<sub>2</sub>-1 (1.0 mM) and ReS<sub>2</sub>/TiO<sub>2</sub>-1.5 (1.5 mM), respectively.

### 1.3 Catalyst Characterizations

The prepared TiO<sub>2</sub> NWs and ReS<sub>2</sub>/TiO<sub>2</sub> heterostructures was determined by X-ray diffraction (XRD) using a Rigaku D/M ax-2400 diffractometer operated at 40 kV and

40 mA with Cu K $\alpha$  radiation ( $\lambda = 0.15418$  nm). Raman spectra measurements were carried out on a Raman spectrometer (Jobin Yvon Co., France) model HR800 and 532 nm laser as the excitation wavelength. Morphological properties of the TiO<sub>2</sub> NWs and ReS<sub>2</sub>/TiO<sub>2</sub> heterostructures were examined by a field emission scanning electron microscopy (FESEM, JEOLJSM-S4800) operated at an accelerating voltage of 10.0 kV. The microstructure was determined by transmission electron microscopy (TEM, Tecnai<sup>TM</sup> G2 F30). X-ray photoelectron spectroscopy (XPS) measurements were performed on a PHI-5702 instrument operated with a Mg-K $\alpha$  excitation source (1253.6 eV). Binding energies (BE) were determined using the C 1s peak at 284.8 eV as a charge reference. Electron paramagnetic resonance (ESR) spectroscopy was obtained on a Bruker 200 spectrometer. The absorbance data of spectrophotometer were measured on U-3900H UV-vis spectrophotometer (Hitachi, Japan).

#### **1.4 Electrochemical measurements**

Electrochemical measurements were carried out on Metrohm Autolab workstation (PGSTAT302N, Metrohm) using a stand three-electrode configuration and gastight H-type electrolytic cell. In cathodic chamber, the as-prepared materials (an effective geometric area of 1.0 $\times$ 1.0 cm<sup>2</sup>) and Ag/AgCl electrode (in saturated KCl electrolyte) were served as the working electrode and reference electrode, respectively. A graphite rod was used as counter electrode in the anodic chamber. The H type electrolytic cell was separated by a Nafion 211 membrane (Dupont) which was protonated by boiling in the 5% H<sub>2</sub>O<sub>2</sub> aqueous and heating 0.5 M H<sub>2</sub>SO<sub>4</sub> for 1 h, respectively, and then washing with ultrapure water for 6 h. All potentials measured were converted to the

reversible hydrogen electrode (RHE) through calibration with the following equation:

$$E \text{ (V vs. RHE)} = E \text{ (V vs. Ag/AgCl)} + 0.197 + 0.059 \times \text{pH} \text{ (Number this equation).}$$

Before electrolysis, the working electrode was immersed in the electrolyte for 2h to remove the influence of pollutants and N<sub>2</sub> and Ar was purged into the electrolyte for at least 30 min with a flowing rate of 50 mL min<sup>-1</sup> to remove the air. Before feeding the gas into the electrolyte, it was further purified through 0.01 M H<sub>2</sub>SO<sub>4</sub> and distilled water to remove the possible NH<sub>3</sub> and NO<sub>x</sub><sup>2</sup>. During electrolysis, high-purity N<sub>2</sub> was continuously fed into the cathodic compartment with a flow of 20 sccm. After NRR, the produced tail gas (e.g., N<sub>2</sub>) was further absorbed by two-series tail gas absorbers (each absorber contains 50 mL of 0.01 M H<sub>2</sub>SO<sub>4</sub> solution) to prevent the produced NH<sub>3</sub> during NRR with N<sub>2</sub> flow into air. Linear sweep voltammogram (LSV) was scanned at a rate of 5 mV s<sup>-1</sup>. Chronoamperometry technology was applied to study the NH<sub>3</sub> synthesis performance.

The electrochemical impedance spectroscopy (EIS) of the electrodes were measured at -0.1 V versus RHE in the frequency range from 100 kHz to 0.01 Hz with an amplitude of 10 mV. To determine the double-layer capacitance (C<sub>dl</sub>), a series of CV measurements were carried out at different scan rates (20, 40, 60, 80 and 100 mV•s<sup>-1</sup>) in a non-Faradaic region (1.04-1.14 V vs. RHE).

### **1.5 Determination of Ammonia**

The concentration of produced ammonia was detected by a reported indophenol blue method<sup>3</sup>.

#### **a) Stock reagent:**

- 1) Chromogenic reagent (A): 1 M NaOH solution containing 5% sodium citrate and 5% sodium salicylate was prepared.
- 2) Oxidizing solution (B): 0.05 M NaClO solution (available chlorine 10-15%) was prepared.
- 3) Catalysing reagent (C): 1 wt %  $C_5FeN_6Na_2O$  solution was prepared.

#### **b) Standard solutions preparation**

- 1) 1000  $\mu\text{g}_{\text{NH}_3}/\text{mL}$  solution: 0.3809 g of pre-dried  $\text{NH}_4\text{Cl}$  (105 °C for 4 h) was added in 100 mL of 0.1 M  $\text{Na}_2\text{SO}_4$  solution.
- 2) 10  $\mu\text{g}_{\text{NH}_3}/\text{mL}$  solution: 1 mL of 1000  $\mu\text{g}_{\text{NH}_3}/\text{mL}$  stock solution was added in a 100 mL volumetric flask, and added 0.1 M  $\text{Na}_2\text{SO}_4$  solution to the scale mark.
- 3) 0.2, 0.4, 0.8, 1.2, 1.6 and 2 mL of 10  $\mu\text{g}_{\text{NH}_3} \text{ mL}^{-1}$  stock solution were separately added into a 20 mL volumetric flask and added 0.10 M  $\text{Na}_2\text{SO}_4$  solution to the scale mark to obtain 0.1, 0.2, 0.4, 0.6, 0.8 and 1  $\mu\text{g}_{\text{NH}_3} \text{ mL}^{-1}$  standard solutions.

#### **c) UV-vis measurement**

Typically, 2 mL of standard solutions or sample solution was firstly added to 10 mL of colorimetric tube, where 2 mL of reagent (A), 1 mL of reagent (B) and 0.2 mL of reagent (C) were then subsequently added. The mixed solution was kept at room temperature for 2 h and subjected to the UV-vis tests. The ammonia concentration was determined depending on the absorbance at a wavelength of 655 nm. The calibrated concentration-absorbance curve was provided in Fig. S5, which was  $y = 0.556x + 0.0576$  ( $R^2=0.999$ ). The ammonia yield rate was calculated based on the equation:

$$\text{NH}_3 \text{ yield rate} = \frac{c \times V}{A \times t} \quad (\text{S1})$$

Where  $c$  is the measured  $\text{NH}_3$  concentration;  $V$  is the volume of the electrolyte;  $t$  is the electrolysis time, and  $A$  is the working electrode area ( $1.0 \times 1.0 \text{ cm}^2$ ).

The Faradaic efficiency was calculated according to the following equation:

$$FE(\%) = \frac{3 \times F \times c \times V}{17 \times Q} \times 100\% \quad (\text{S2})$$

Where  $F$  is the Faraday constant ( $96485 \text{ C mol}^{-1}$ ),  $c$  is the measured  $\text{NH}_3$  concentration,  $V$  is the volume of the electrolyte and  $Q$  is the total charge used for the electrodes (C).

### 1.6 Hydrazine quantification

The by-product of hydrazine was assessed by the method of Watt and Chrisp<sup>4</sup>. Typically, a mixture of pdimethylaminobenzaldehyde (5.99 g), concentrated HCl (30 mL) and  $\text{C}_2\text{H}_5\text{OH}$  (300 mL) were used as a color reagent. In detail, 5.0 mL electrolyte pipetted from the cathodic chamber added into 5.0 mL of the above prepared color reagent. After standing the mixture solution at room temperature for 10 min, UV-vis absorption spectra was measured at a wavelength of 457 nm. The concentration ( $\text{N}_2\text{H}_4 \cdot \text{H}_2\text{O}$ )-absorbance curve was calibrated using standard hydrazine solution with a series of  $\text{N}_2\text{H}_4 \cdot \text{H}_2\text{O}$  concentrations (0, 0.2, 0.6, 1.2, 1.5, 2.0  $\mu\text{g mL}^{-1}$ ). The fitting curve ( $y=0.162x+0.04$ ,  $R^2=0.998$ ) shows good linear relation between the absorbance value and hydrazine concentration.

## 2. Supplementary Figures

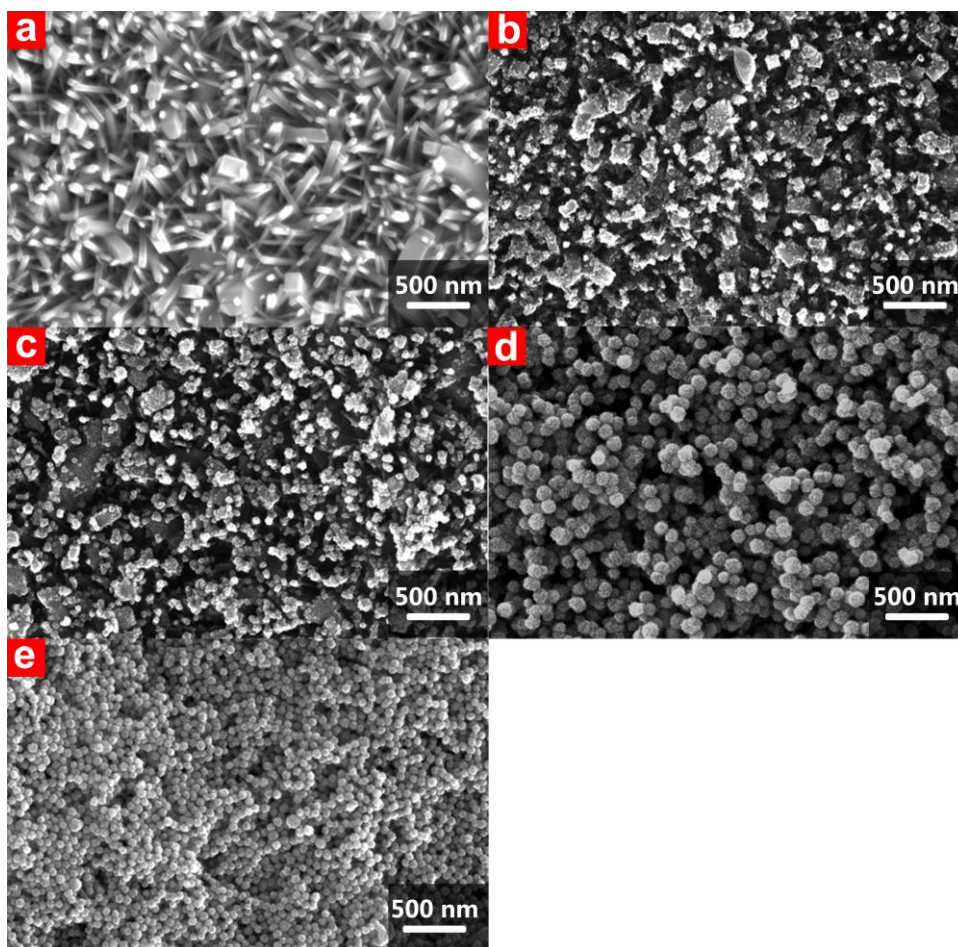

**Fig. S1** SEM images of (a) TiO<sub>2</sub> NWs, (b) ReS<sub>2</sub>/TiO<sub>2</sub>-0.75, (c) ReS<sub>2</sub>/TiO<sub>2</sub>-1, (d) ReS<sub>2</sub>/TiO<sub>2</sub>-1.5 and (e) ReS<sub>2</sub>/TiO<sub>2</sub>-3 heterostructure.

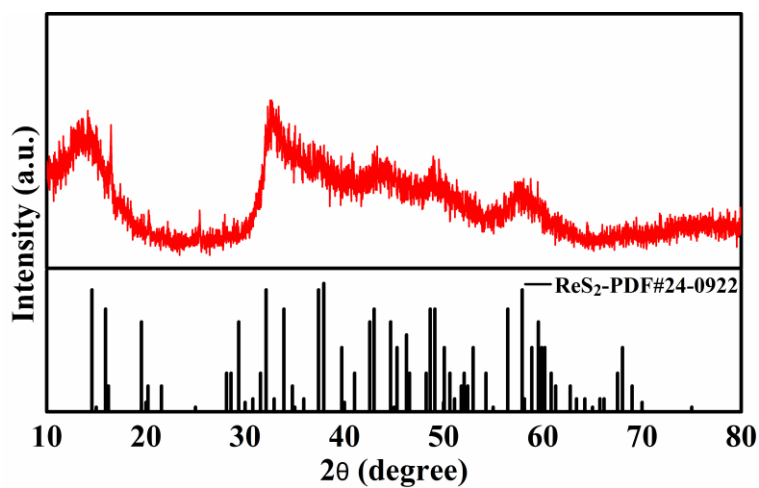

**Fig. S2** XRD pattern of rehenium disulfide powders.

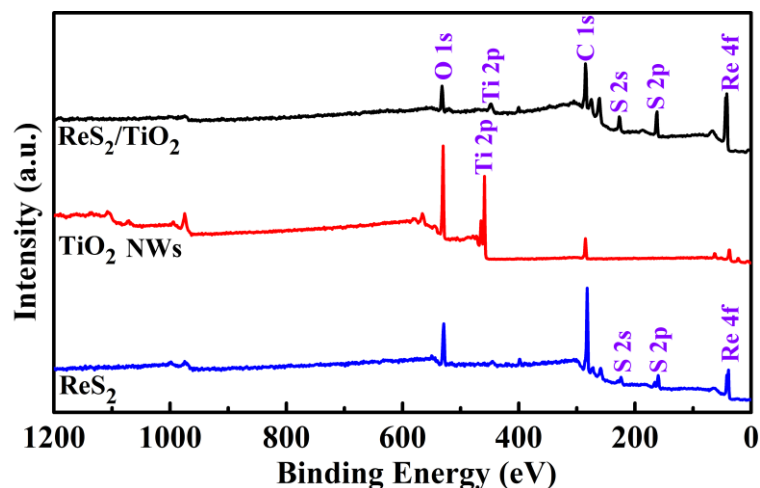

**Fig. S3** Wide-scan survey XPS spectrum of  $\text{ReS}_2$  powder,  $\text{TiO}_2$  NWs and  $\text{ReS}_2/\text{TiO}_2$  heterostructure.

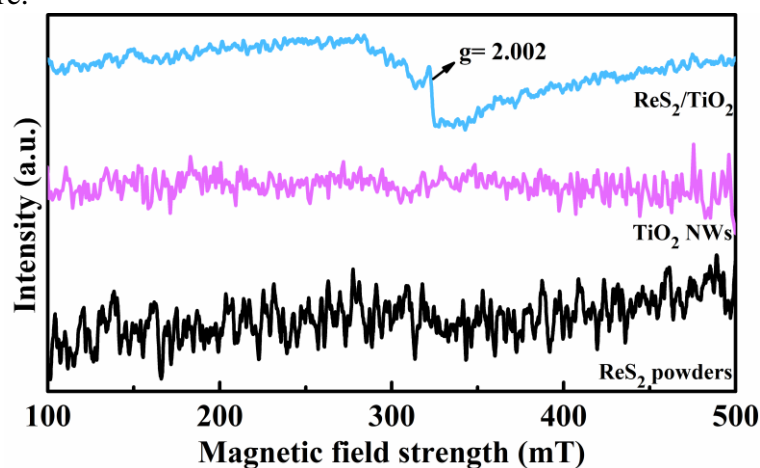

**Fig. S4** EPR spectra of  $\text{ReS}_2/\text{TiO}_2$  heterostructure,  $\text{TiO}_2$  NWs and  $\text{ReS}_2$  powders.

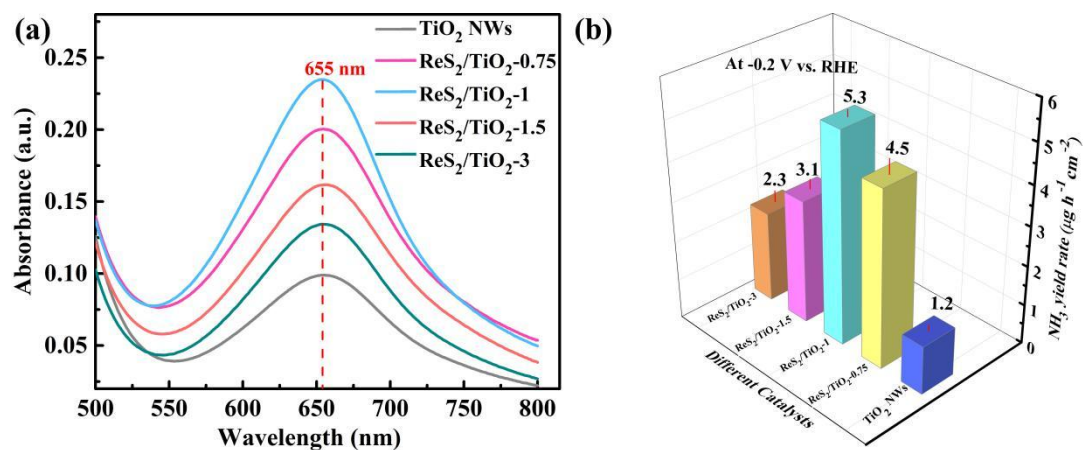

**Fig. S5** (a) UV-vis absorbance and (b)  $\text{NH}_3$  yield rate of  $\text{TiO}_2$  NWs,  $\text{ReS}_2/\text{TiO}_2$ -0.75,  $\text{ReS}_2/\text{TiO}_2$ -1,  $\text{ReS}_2/\text{TiO}_2$ -1.5 and  $\text{ReS}_2/\text{TiO}_2$ -3 at -0.2 V vs. RHE.



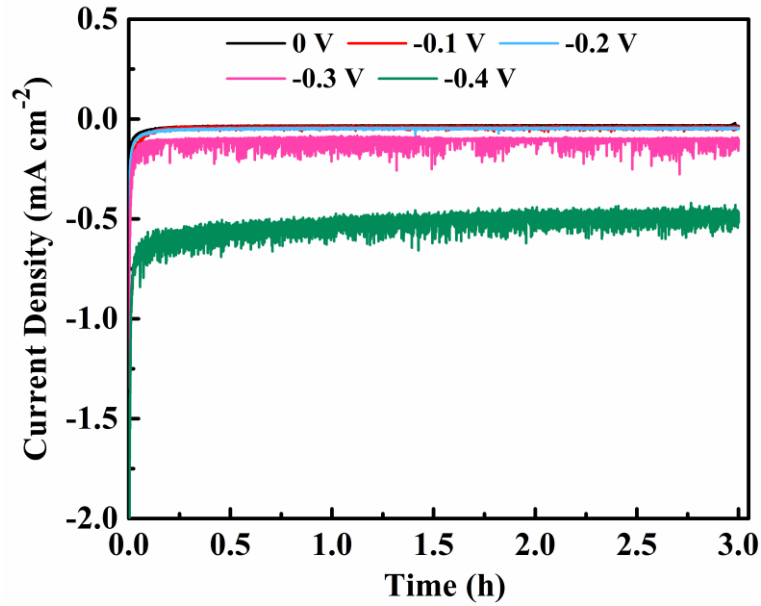

**Fig. S6** Chronoamperometry curves of ReS<sub>2</sub>/TiO<sub>2</sub> heterostructure at different potentials for 3 h in N<sub>2</sub>-saturated 0.1 M Na<sub>2</sub>SO<sub>4</sub> electrolytes.

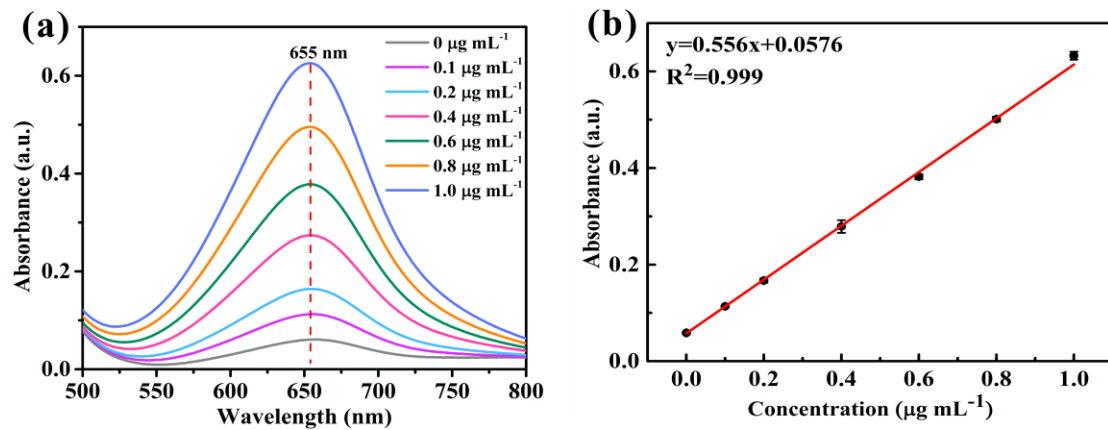

**Fig. S7** Standard curves for NH<sub>4</sub>Cl solution with different concentrations in 0.1 M Na<sub>2</sub>SO<sub>4</sub> by indophenol blue colorimetric method. (a) UV-vis spectra of various ammonia concentrations after stained with indophenol indicator for 2 h and (b) the corresponding linear fitting between absorbance and NH<sub>4</sub>Cl concentration.

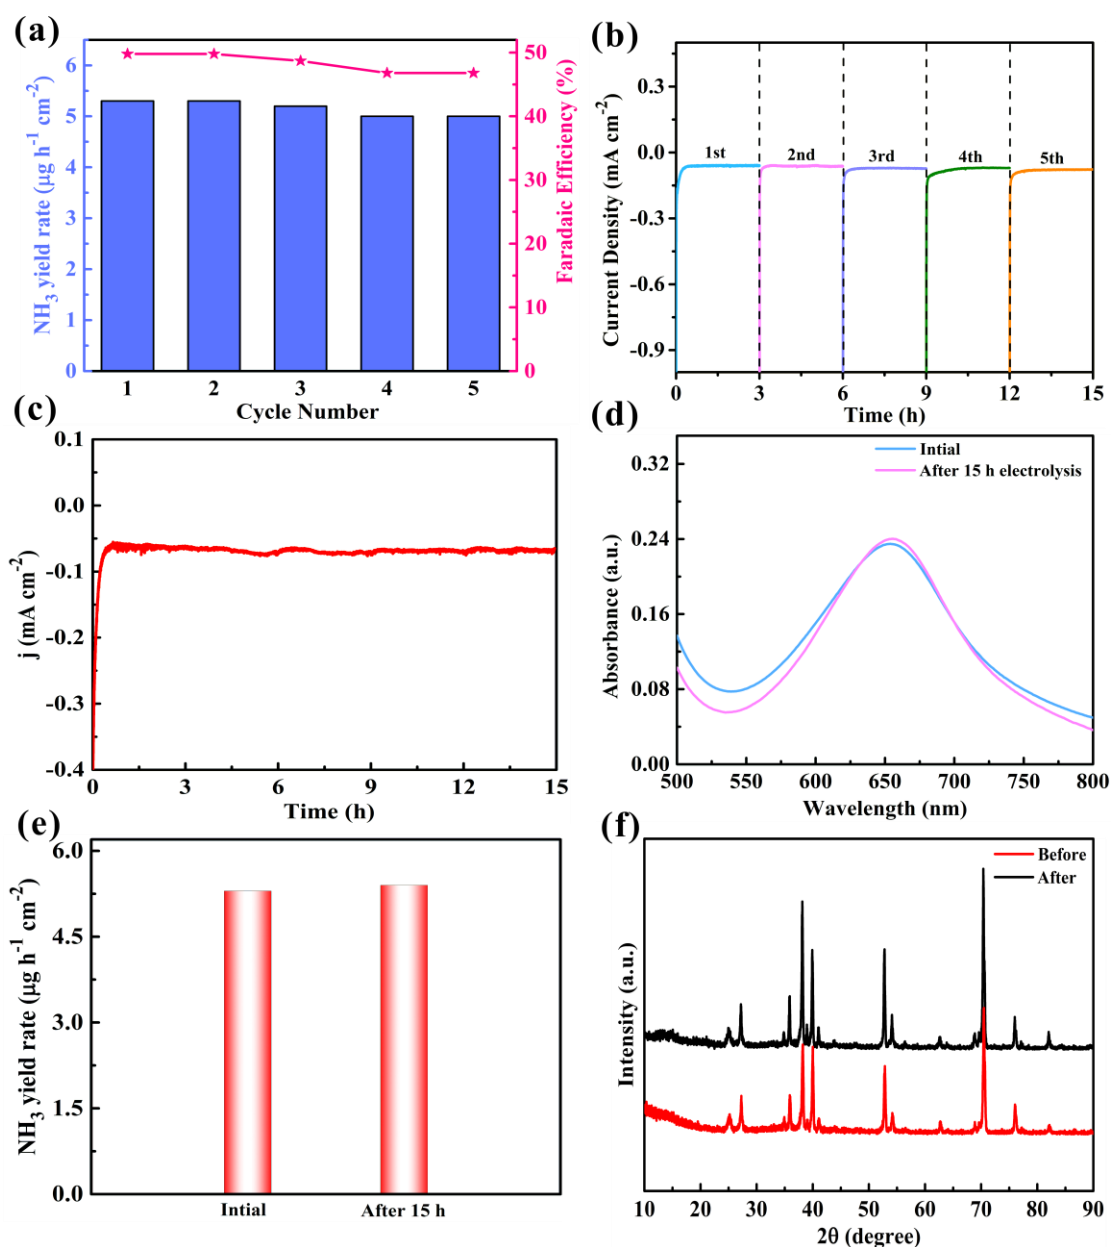

**Fig. S8** (a) The  $\text{NH}_3$  yield rate and FE over five successive measurements, (b) Chronoamperometry curves of  $\text{ReS}_2/\text{TiO}_2$  heterostructure reuse five times, (c) Chronoamperometry curve at  $-0.2 \text{ V}$  vs. RHE working continuously for 15 h, (d) UV-vis absorption spectra of solutions before and after the long-term chronoamperometric measurement, (e)  $\text{NH}_3$  yield rate at  $-0.2 \text{ V}$  vs. RHE after electrolysis for 3 h before and after long-term electrolysis and (f) XRD patterns of  $\text{ReS}_2/\text{TiO}_2$  heterostructure before and after recycling test.

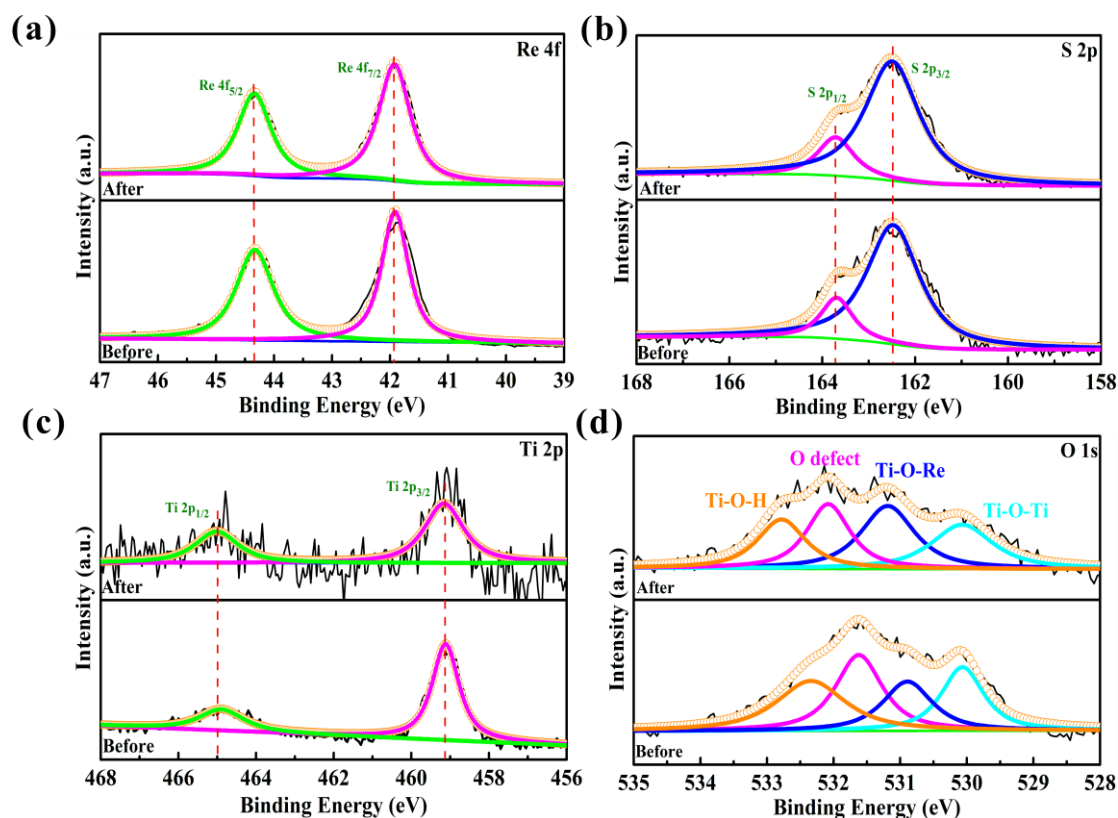

**Fig. S9** High resolution XPS spectrum for ReS<sub>2</sub>/TiO<sub>2</sub> heterostructure before and after recycling test: (a) Re 4f, (b) S 2p, (c) Ti 2p and (d) O 1s.

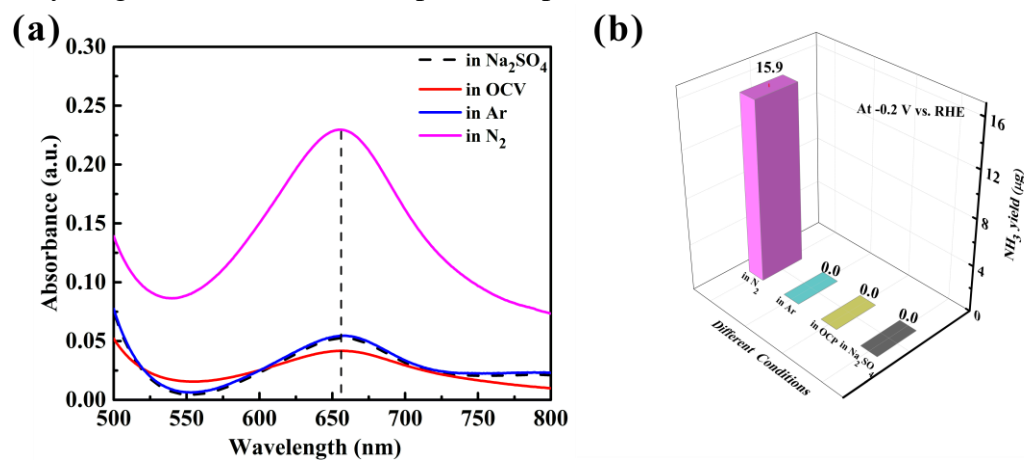

**Fig. S10** (a) UV-vis absorption spectra of the electrolytes stained with indophenol indicator after 3 h potentiostatic electrolysis on ReS<sub>2</sub>/TiO<sub>2</sub> heterostructure in different conditions and (b) the corresponding of NH<sub>3</sub> yield.

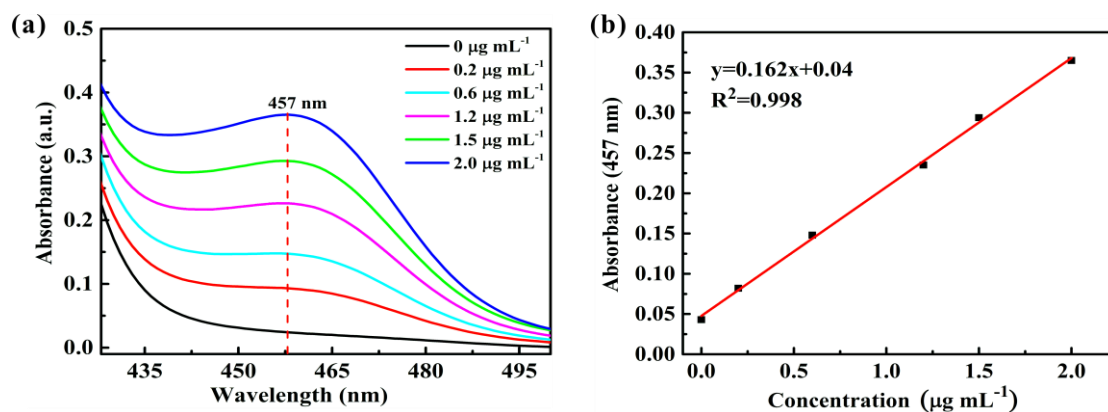

**Fig. S11** Standard curves for hydrazine with different concentrations in 0.1 M Na<sub>2</sub>SO<sub>4</sub> by the Watt and Chrisp method. (a) UV-vis spectra and (b) corresponding linear fitting between absorbance at 457 nm and hydrazine concentration.

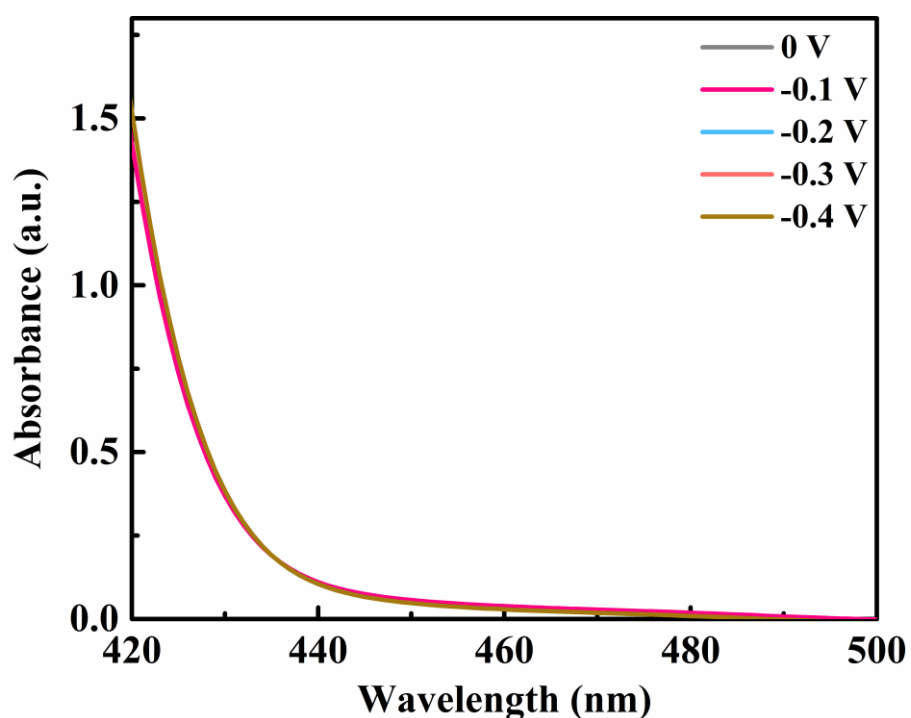

**Fig. S12** Typical UV-vis spectra for detecting hydrazine in the cathodic chamber after electrolysis at different potentials in 0.1 M Na<sub>2</sub>SO<sub>4</sub>.

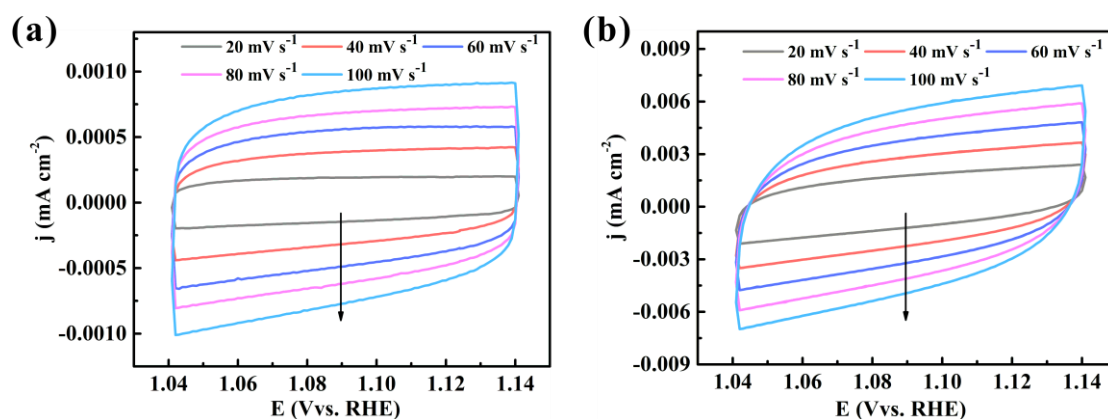

**Fig. S13** Electrochemical cyclic voltammetry curves at different potential scanning rates for (a) TiO<sub>2</sub> NWs and (b) ReS<sub>2</sub>/TiO<sub>2</sub> heterostructure.

**Table S1.** Comparison of the NRR activity of ReS<sub>2</sub>/TiO<sub>2</sub> electrocatalyst with other aqueous-based catalysts reported recently under ambient conditions.

| Catalysts                                      | Electrolytes                          | NH <sub>3</sub> production rate                             | Faradaic efficiency | Reference |
|------------------------------------------------|---------------------------------------|-------------------------------------------------------------|---------------------|-----------|
| Mxene                                          | 0.5 M Li <sub>2</sub> SO <sub>4</sub> | 4.70 μg h <sup>-1</sup> cm <sup>-2</sup>                    | 5.8 %               | 5         |
| TiO <sub>2</sub> /Ti                           | 0.1 M Na <sub>2</sub> SO <sub>4</sub> | 5.60 μg h <sup>-1</sup> cm <sup>-2</sup>                    | 2.5 %               | 6         |
| MoS <sub>2</sub> /CC                           | 0.1 M Na <sub>2</sub> SO <sub>4</sub> | 4.9 μg h <sup>-1</sup> cm <sup>-2</sup>                     | 1.2 %               | 7         |
| SnS <sub>2</sub> @Ni                           | 0.1 M Na <sub>2</sub> SO <sub>4</sub> | 9.1710 <sup>-10</sup> mol s <sup>-1</sup> cm <sup>-2</sup>  | 10.8 %              | 8         |
| Bi-CeO <sub>2</sub>                            | 0.5 M K <sub>2</sub> SO <sub>4</sub>  | 6.3 μg h <sup>-1</sup> cm <sup>-2</sup>                     | 8.6 %               | 9         |
| Au nanorod                                     | 0.1 M KOH                             | 1.6 μg h <sup>-1</sup> cm <sup>-2</sup>                     | 4 %                 | 10        |
| CrN                                            | 0.05 M H <sub>2</sub> SO <sub>4</sub> | 12.9 μg h <sup>-1</sup> mg <sup>-1</sup> <sub>cat.</sub>    | 15.1 %              | 11        |
| TiO <sub>2</sub> -rGO                          | 0.1 M Na <sub>2</sub> SO <sub>4</sub> | 15.1 μg h <sup>-1</sup> mg <sup>-1</sup> <sub>cat.</sub>    | 3.3 %               | 12        |
| Y-TiO <sub>2</sub> -C                          | 0.1 M HCl                             | 6.3 μg h <sup>-1</sup> mg <sup>-1</sup>                     | 11.0 %              | 13        |
| Ru-TiO <sub>2</sub> -Vo                        | 0.1 M KOH                             | 2.10 μg h <sup>-1</sup> cm <sup>-2</sup>                    | 0.8 %               | 14        |
| SnO <sub>2</sub>                               | 0.1 M Na <sub>2</sub> SO <sub>4</sub> | 9.0 μg h <sup>-1</sup> cm <sup>-2</sup>                     | 2.2 %               | 15        |
| DG-800                                         | 0.01 M H <sub>2</sub> SO <sub>4</sub> | 4.3 μg h <sup>-1</sup> mg <sup>-1</sup> <sub>cat.</sub>     | 8.5 %               | 16        |
| S <sub>v</sub> -Sb <sub>2</sub> S <sub>3</sub> | 0.1 M Na <sub>2</sub> SO <sub>4</sub> | 10.8 μg h <sup>-1</sup> mg <sup>-1</sup> <sub>cat.</sub>    | 3.8 %               | 17        |
| Ag nanosheet                                   | 0.1 M HCl                             | 2.8 μg h <sup>-1</sup> cm <sup>-2</sup>                     | 4.8 %               | 18        |
| P-doped LDHs                                   | 0.1 M Na <sub>2</sub> SO <sub>4</sub> | 1.72×10 <sup>-10</sup> mol s <sup>-1</sup> cm <sup>-2</sup> | 23 %                | 19        |
| Pd <sub>0.2</sub> Cu <sub>0.8</sub> /rGO       | 0.1 M KOH                             | 2.8 μg h <sup>-1</sup> mg <sup>-1</sup> <sub>cat.</sub>     | -                   | 20        |
| ReS <sub>2</sub> /TiO <sub>2</sub>             | 0.1 M Na <sub>2</sub> SO <sub>4</sub> | 5.3 μg h <sup>-1</sup> cm <sup>-2</sup>                     | 6.7 %               | This work |

## Reference:

- 1 C. Xu, H. Geng, R. Bennett, D. A. Clayton, S. Pan, *J. Phys. Chem. C*, 2013, *117*, 1849-1856.
- 2 F. Zhou, L. M. Azofra, M. Ali, M. Kar, A. N. Simonov, C. McDonnell-Worth, C. Sun, X. Zhang, D. R. MacFarlane, *Energy Environ. Sci.*, 2017, *10*, 2516-2520.
- 3 D. Zhu, L. Zhang, R. E. Ruther, R. J. Hamers, *Nature Mater.*, 2013, *12*, 836-841.
- 4 G. W. Watt, J. D. Chrisp, *Anal. Chem.*, 1952, *24*, 2006-2008.
- 5 Y. Luo, G. F. Chen, L. Ding, X. Chen, L. X. Ding, H. Wang, *Joule*, 2019, *3*, 279-289.
- 6 R. Zhang, X. Ren, X. Shi, F. Xie, B. Zheng, X. Guo, X. Sun, *ACS Appl. Mater. Inter.*, 2018, *10*, 28251-28255.
- 7 L. Zhang, X. Ji, X. Ren, Y. Ma, X. Shi, Z. Tian, A. M. Asiri, L. Chen, B. Tang, X. Sun, *Adv. Mater.*, 2018, *30*, 1800191.
- 8 X. Chen, Y. T. Liu, C. Ma, J. Yu, B. Ding, *J. Mater. Chem. A*, 2019, *7*, 22235-22241.
- 9 Y. Liu, C. Li, L. Guan, K. Li, Y. Lin, *J. Phys. Chem. C*, 2020, *124*, 18003-18009.
- 10 D. Bao, Q. Zhang, F. L. Meng, H. X. Zhong, M. M. Shi, Y. Zhang, J. M. Yan, Q. Jiang, X. B. Zhang, *Adv. Mater.*, 2017, *29*, 1604799.
- 11 W. Guo, Z. Liang, Y. Tang, K. Cai, Q. Tianjie, Y. Wu, K. Zhang, S. Gao, R. Zou, *J. Mater. Chem. A*, 2021, DOI: 10.1039/D0TA11727G.
- 12 X. Zhang, Q. Liu, X. Shi, A. M. Asiri, Y. Luo, X. Sun, T. Li, *J. Mater. Chem. A*, 2018, *6*, 17303-17306.
- 13 L. Yang, C. Choi, S. Hong, Z. Liu, Z. Zhao, M. Yang, H. Shen, A. W. Robertson, H.

- Zhang, T. W. B. Lo, Y. Jung, Z. Sun, *Chem. Commun.*, 2020, 56, 10910-10913.
- 14 S. Cheng, Y. J. Gao, Y. L. Yan, X. Gao, S. H. Zhang, G. L. Zhuang, S. W. Deng, Z. Wei, X. Zhong, J. G. Wang, *J. Energy Chem.*, 2019, 39, 144-151.
- 15 L. Zhang, X. Ren, Y. Luo, X. Shi, A. M. Asiri, T. Li, X. Sun, *Chem. Commun.*, 2018, 54, 12966-12969.
- 16 Y. Du, C. Jiang, W. Xia, L. Song, P. Li, B. Gao, C. Wu, L. Sheng, J. Ye, T. Wang, J. He, *J. Mater. Chem. A*, 2020, 8, 55-61.
- 17 X. Wang, J. Bai, Y. Wang, X. Lu, Z. Zou, J. Huang, C. Xu, *Green Energy & Environment*, 2020, DOI: <https://doi.org/10.1016/j.gee.2020.11.016>.
- 18 H. Huang, L. Xia, X. Shi, A. M. Asiri, X. Sun, *Chem. Commun.*, 2018, 54, 11427-11430.
- 19 Y. T. Liu, L. Tang, J. Dai, J. Yu, B. Ding, *Angew. Chem. Int. Ed.*, 2020, 59, 13623-13627.
- 20 M. M. Shi, D. Bao, S. J. Li, B. R. Wulan, J. M. Yan, Q. Jiang, *Adv. Energy Mater.*, 2018, 8, 1800124.
